# Supplementary material for: Trigger medications and patient-related risk factors for Parkinson disease psychosis requiring anti-psychotic drugs: a retrospective cohort study
Source: PubMed Central journal article supplement (PMC3879653; doi:10.1186/1471-2377-13-145), 2013-10-12

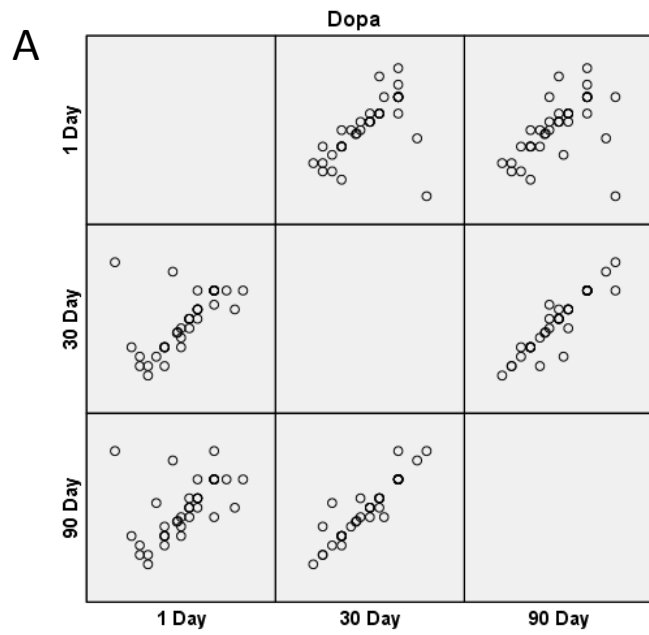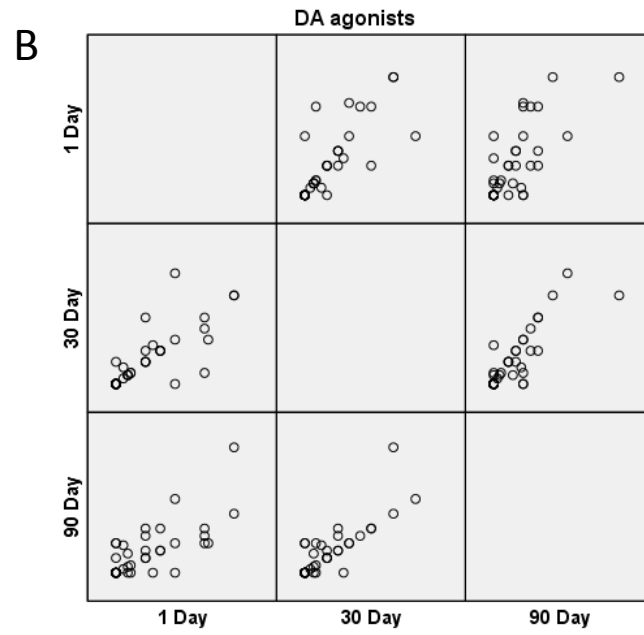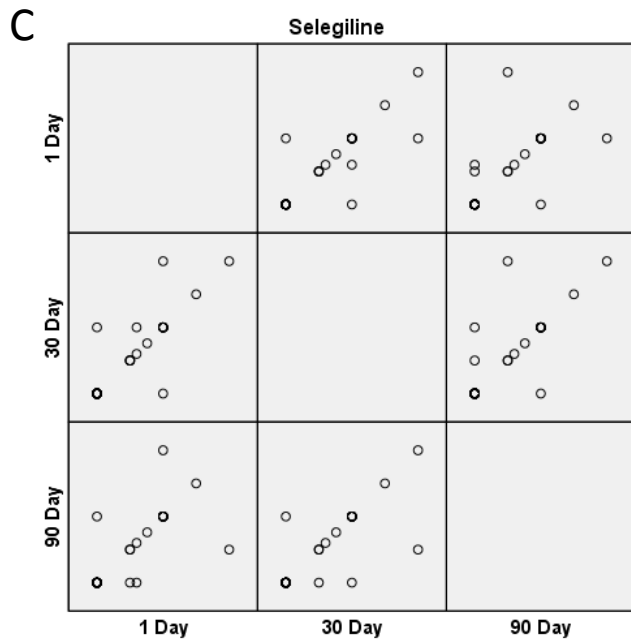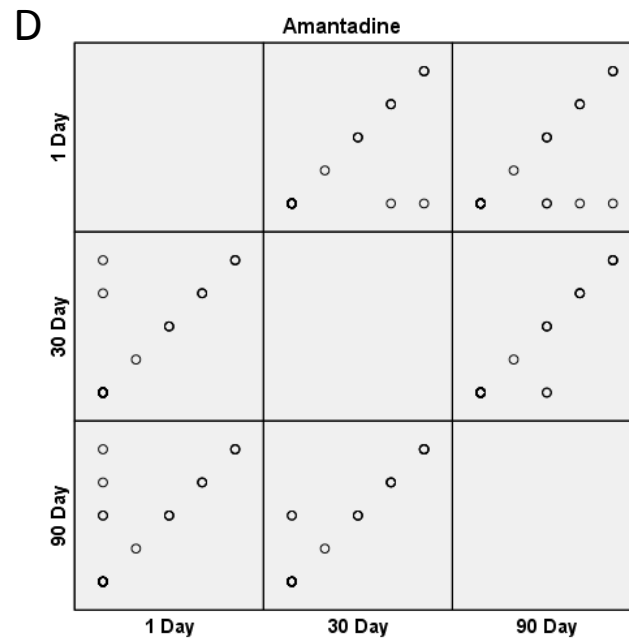

Supplement: 1471-2377-13-145-S2.pdf [file 1471-2377-13-145-S2.pdf]
